# Supplementary material for: Type 2 diabetes mellitus as a risk factor for the onset of depression: a systematic review and meta-analysis
Source: PubMed Central journal article supplement — Diabetologia. 2010 Aug 14;53(12):2480–6. doi: 10.1007/s00125-010-1874-x (PMC2974923; doi:10.1007/s00125-010-1874-x), 2010-08-14
Supplement: 125_2010_1874_MOESM1_ESM.pdf [file 125_2010_1874_MOESM1_ESM.pdf]

## Electronic supplementary material

**ESM Table 1** Search terms used to identify relevant articles in EMBASE, MEDLINE and PsycINFO databases

| Search no. | Search terms                                                                                                                                                                                                                                |
|------------|---------------------------------------------------------------------------------------------------------------------------------------------------------------------------------------------------------------------------------------------|
| 1          | Diabetes Mellitus, Type 2/ [MeSH] px, ep [Psychology, Epidemiology] OR Diabetes Mellitus/ [MeSH] OR diabet*.mp. [mp=title, original title, abstract, name of substance word, subject heading word]                                          |
| 2          | *Depression /[MeSH] ep [Epidemiology] OR depressive disorder/ [MeSH] or depressive disorder, major/ [MeSH] or dysthymic disorder/ [MeSH] OR depress*.mp. [mp=title, original title, abstract, name of substance word, subject heading word] |
| 3          | exp Cohort Studies / [MeSH] OR prevalence/ [MeSH] OR incidence/ [MeSH] OR (cohort and stud*).mp. [mp=title, original title, abstract, name of substance word, subject heading word]                                                         |
| 4          | Humans/ [MeSH]                                                                                                                                                                                                                              |
| 5          | ((risk* or associa* or prevalen* or relationship*) adj (depress* or dysthym*)).mp. [mp=title, original title, abstract, name of substance word, subject heading word]                                                                       |
| 6          | #1 AND #2 AND #3 AND #4 AND #5                                                                                                                                                                                                              |
