# Supplementary material for: Type 2 diabetes mellitus as a risk factor for the onset of depression: a systematic review and meta-analysis
Source: PubMed Central journal article supplement — Diabetologia. 2010 Aug 14;53(12):2480–6. doi: 10.1007/s00125-010-1874-x (PMC2974923; doi:10.1007/s00125-010-1874-x), 2010-08-14
Supplement: 125_2010_1874_MOESM2_ESM.pdf [file 125_2010_1874_MOESM2_ESM.pdf]

## Electronic supplementary material

**ESM Table 2** Selected characteristics of studies examining the incidence of depression in type 2 diabetes mellitus

| Study                     | Design                                | Number of participants without depression at baseline    |                                                          |                                             | Age (years) at baseline                  |                |             | Length of follow-up (years)                   | Criteria for depression                                                                           | Assessment of T2DM                                                       | Cases of incident depression                              | Outcome unadjusted                                                                                                                                  | Outcome adjusted                                                                                  | Methodological issues                                                                                                                         |
|---------------------------|---------------------------------------|----------------------------------------------------------|----------------------------------------------------------|---------------------------------------------|------------------------------------------|----------------|-------------|-----------------------------------------------|---------------------------------------------------------------------------------------------------|--------------------------------------------------------------------------|-----------------------------------------------------------|-----------------------------------------------------------------------------------------------------------------------------------------------------|---------------------------------------------------------------------------------------------------|-----------------------------------------------------------------------------------------------------------------------------------------------|
|                           |                                       | Baseline                                                 | Follow-up I                                              | Follow-up II                                | Mean (SD)                                | Range          | % Male      |                                               |                                                                                                   |                                                                          |                                                           |                                                                                                                                                     |                                                                                                   |                                                                                                                                               |
| USA: Palinkas et al. [21] | Prospective population study          | <i>N</i> =971<br>DM: 116 (11.9%)                         | <i>N</i> =971<br>16.1% had T2DM                          | n/a                                         | 66.2 (8.7)                               | 50–89          | 43          | 8                                             | BDI ≥11                                                                                           | OGTT, medication for diabetes, advised by physician, or FPG ≥ 7.0 mmol/l | 118 (12%)                                                 | χ <sup>2</sup> =0.01, <i>p</i> =NS                                                                                                                  | OR = 0.73 (95% CI = 0.41–1.30) <sup>a</sup>                                                       | 3 of the 21 BDI items excluded at baseline<br><br>Predominantly female                                                                        |
| NL: Bisschop et al. [22]  | Prospective population study          | <i>N</i> =2,277<br>DM: <i>n</i> =121 (5.3%)              | <i>N</i> =2,205<br>DM: <i>n</i> =165                     | <i>N</i> =1,839<br>DM: <i>n</i> =176 (9.6%) | 68.8 (8.5)                               | 55–85          | 46.7        | 3, 6                                          | CES-D ≥16                                                                                         | Self-report                                                              | n/a                                                       | n/a                                                                                                                                                 | OR = 0.97 (95% CI = 0.714–1.306) <sup>b</sup><br><br>OR = 0.73 (95% CI = 0.53–0.998) <sup>c</sup> | Participants with depression at baseline controlled for statistically                                                                         |
| USA: Polsky et al. [23]   | Prospective cohort study              | <i>N</i> =8,387<br>DM: <i>n</i> =571                     | n/a                                                      | n/a                                         | 55.8 (3.2)                               | 51–61          | 48.2        | 2, 4, 6, 8                                    | 8 items of the CES-D with cut-off score of 5                                                      | Self-report                                                              | No DM: 5.7%<br>DM: 5.5%                                   | >0–2 years HR=1.03 (0.70–1.52), <i>p</i> =0.87<br>>2–4 years HR=1.02 (0.62–1.69), <i>p</i> =0.93<br>>4–8 years HR =0.90 (0.51–1.58), <i>p</i> =0.71 | HR = 1.17 (0.98–1.41), <i>p</i> =0.09 <sup>d</sup>                                                | Depressive symptoms assessed 0–2 years after diagnosis of DM<br><br>Only used 8 items of CES-D<br><br>Participants born between 1931 and 1941 |
| CDN: Brown et al. [24]    | Retrospective population-cohort study | <i>N</i> =99,677<br>DM: <i>n</i> =31,635<br>Case matched | <i>N</i> =99,677<br>DM: <i>n</i> =31,635<br>Case matched | n/a                                         | 52<br>non-depressed DM 61.5<br>depressed | 20–95<br>20–95 | n/a<br>55.7 | Average follow-up time was 4.5 years (SD=2.9) | Composite definition: Prescription for antidepressant medication and 3 ICD-9 codes for depressive | Physician service claims for diabetes (ICD-9 code 250) within 2-year     | DM: 919/31,635 (2.9%).<br>Without DM: 1,615/57,141 (2.8%) | HR=1.10 (95% CI = 1.01–1.19)                                                                                                                        | HR=1.04 (0.94–1.15) <sup>e</sup>                                                                  | Blacks and Hispanics over-sampled<br>Some population groups excluded<br><br>Depression diagnosis made by healthcare professionals             |

| Study                    | Design                   | Number of participants without depression at baseline                                                        |                                |                 | Age (years) at baseline     |       |        | Length of follow-up (years) | Criteria for depression                                                                                                                                                                       | Assessment of T2DM                                                                         | Cases of incident depression                                                                                                     | Outcome unadjusted                      | Outcome adjusted                                                                                                                              | Methodological issues                                    |
|--------------------------|--------------------------|--------------------------------------------------------------------------------------------------------------|--------------------------------|-----------------|-----------------------------|-------|--------|-----------------------------|-----------------------------------------------------------------------------------------------------------------------------------------------------------------------------------------------|--------------------------------------------------------------------------------------------|----------------------------------------------------------------------------------------------------------------------------------|-----------------------------------------|-----------------------------------------------------------------------------------------------------------------------------------------------|----------------------------------------------------------|
|                          |                          | Baseline                                                                                                     | Follow-up I                    | Follow-up II    | Mean (SD)                   | Range | % Male |                             |                                                                                                                                                                                               |                                                                                            |                                                                                                                                  |                                         |                                                                                                                                               |                                                          |
|                          |                          | controls: <i>n</i> =57,141                                                                                   | controls: <i>n</i> =57,141     |                 | DM 58.3                     | 21–91 | 47.2%  |                             |                                                                                                                                                                                               |                                                                                            |                                                                                                                                  |                                         |                                                                                                                                               |                                                          |
|                          |                          |                                                                                                              |                                |                 | non-depressed controls 46.9 | 20–94 | 50.2%  |                             | disorder (296, 309, 311) within 6-month period from physician notes                                                                                                                           | period, ≥ 1 hospitalisation with diabetes code as primary, secondary or tertiary diagnosis | Unadjusted incident rate of depression in the diabetes cohort was 6.5 per 1,000 person-years and 6.6 for the non-diabetes cohort |                                         |                                                                                                                                               | DM were incident cases<br>Those on insulin excluded      |
|                          |                          |                                                                                                              |                                |                 | depressed controls 44.5     | 20–93 | 36.7   |                             | Depressive episodes up to 3 years before study index date were excluded                                                                                                                       |                                                                                            |                                                                                                                                  |                                         |                                                                                                                                               |                                                          |
| K: Kim et al. [25]       | Prospective cohort study | <i>N</i> =521 (7 used antidepressant medication. Exclusion did not alter the results<br><br>DM: <i>n</i> =47 | <i>N</i> =521 DM: <i>n</i> =47 |                 | n/a                         | ≥65   | n/a    | 2.4 (0.3)                   | Community version of the Geriatric Mental State diagnostic schedule. Stage one confidence level of 3 or above in the Automated geriatric Examination for Computer Assisted Taxonomy algorithm | Self-report                                                                                | DM: 47                                                                                                                           | OR = 1.0 (95% CI = 0.4–2.5)             |                                                                                                                                               | No details regarding diabetes.<br><br>Small <i>N</i>     |
| SP: De Jonge et al. [26] | Prospective cohort study | <i>N</i> =4,757<br><br>DM: <i>n</i> =597<br>46 people were doubtful cases and deleted from analysis          | <i>N</i> =3,237                | <i>N</i> =2,403 | 73.5 (9.9)                  | ≥55   | 42.5   | 2, 5                        | Mini-Mental State Examination; interview based on Geriatric Mental State                                                                                                                      | Self-report                                                                                | DM: 98/597 (16.5%) <sup>f</sup><br><br>Without DM: 520/4,160 (12.4% )                                                            | OR unadjusted = 1.4 (95% CI = 1.03–1.9) | OR adjusted = 1.42 (95% CI = 1.04–1.93) <sup>g</sup><br><br>When no other chronic somatic disease OR 1.26 (95% CI 0.90–1.77), NS <sup>h</sup> | Used diagnosis of depression<br><br>Predominantly female |

| Study                    | Design                                                          | Number of participants without depression at baseline |                                      |              | Age (years) at baseline                                      |       |                      | Length of follow-up (years) | Criteria for depression                                                                                                                                                                                                                                       | Assessment of T2DM                                                                                                                 | Cases of incident depression                                                            | Outcome unadjusted                              | Outcome adjusted                                                                                                                            | Methodological issues                                                 |
|--------------------------|-----------------------------------------------------------------|-------------------------------------------------------|--------------------------------------|--------------|--------------------------------------------------------------|-------|----------------------|-----------------------------|---------------------------------------------------------------------------------------------------------------------------------------------------------------------------------------------------------------------------------------------------------------|------------------------------------------------------------------------------------------------------------------------------------|-----------------------------------------------------------------------------------------|-------------------------------------------------|---------------------------------------------------------------------------------------------------------------------------------------------|-----------------------------------------------------------------------|
|                          |                                                                 | Baseline                                              | Follow-up I                          | Follow-up II | Mean (SD)                                                    | Range | % Male               |                             |                                                                                                                                                                                                                                                               |                                                                                                                                    |                                                                                         |                                                 |                                                                                                                                             |                                                                       |
| N: Engum [27]            | Prospective population-based study <sup>i</sup>                 | <i>N</i> =37,291<br>DM: <i>n</i> =337                 | n/a                                  |              | Non-depressed<br>55.2 (14.0)<br><br>depressed<br>57.5 (13.4) | 30–89 | 49<br><br>40.9       | 10                          | T1: compound index of four items relating to nervousness, calmness, mood, and vitality<br><br>T2: HADS-D (≥8) and compound index                                                                                                                              | T1: Self-report<br><br>T2: self-report and non-fasting glucose, HbA <sub>1c</sub><br><br>GAD, C-peptide test and insulin treatment | 8.4% of all participants without depression/anxiety symptoms at T1 had HADS-D ≥ 8 at T2 | OR = 1.82 (95% CI = 1.14–2.89), <i>p</i> =0.011 | OR = 1.24 (95% CI = 0.78–1.98) <i>p</i> =0.368 <sup>f</sup>                                                                                 | Small <i>N</i><br><br>Assessment of depression different at T1 and T2 |
| USA: Maraldi et al. [28] | Secondary analysis of prospective population study <sup>j</sup> | <i>N</i> =2,522<br>DM=597                             | <i>N</i> =1,925<br>DM: <i>n</i> =597 | -            | 73.7 (2.9)<br>DM: 73.7 (2.9)                                 | 70–79 | 48.4<br><br>DM: 56.6 | 6                           | Prevalent depression: self-report or use of antidepressant<br><br>Incident depression: current use of antidepressant at clinic visits and no prior use of antidepressants<br><br>Depressed symptoms at baseline, and follow-up years 2, 3, 5, and 6: CES-D≥10 | Prevalent DM: self-report or hypoglycaemic medication use<br><br>Uncontrolled DM: FPG ≥ 7 mmol/l or after 75 g OGTT                | Depressed mood:<br><br>DM 145/597 (24.3%)<br><br>Without DM 372/1,925 (19.3%)           | n/a                                             | OR=1.31 (95% CI = 1.07–1.61) <sup>k</sup><br><br>OR=1.27 (95% CI = 1.03–1.57) <sup>l</sup><br><br>OR=1.19 (95% CI = 0.96–1.47) <sup>m</sup> | Age group 70–79 years<br><br>May include T1DM                         |

| Study                      | Design                   | Number of participants without depression at baseline |                 |              | Age (years) at baseline    |       |                      | Length of follow-up (years) | Criteria for depression                                                                                        | Assessment of T2DM                                                                                             | Cases of incident depression                                                                                 | Outcome unadjusted                                             | Outcome adjusted                                                                          | Methodological issues                                                                                                                                                   |
|----------------------------|--------------------------|-------------------------------------------------------|-----------------|--------------|----------------------------|-------|----------------------|-----------------------------|----------------------------------------------------------------------------------------------------------------|----------------------------------------------------------------------------------------------------------------|--------------------------------------------------------------------------------------------------------------|----------------------------------------------------------------|-------------------------------------------------------------------------------------------|-------------------------------------------------------------------------------------------------------------------------------------------------------------------------|
|                            |                          | Baseline                                              | Follow-up I     | Follow-up II | Mean (SD)                  | Range | % Male               |                             |                                                                                                                |                                                                                                                |                                                                                                              |                                                                |                                                                                           |                                                                                                                                                                         |
| USA: Golden et al. [29]    | Prospective cohort study | <i>N</i> =6,814                                       | n/a             | n/a          | n/a                        | n/a   | n/a                  | 3.1                         | CES-D $\geq$ 16, self-reported use of antidepressants or both                                                  | Fasting BG $\geq$ 7 mmol/l or use of oral hypoglycaemic medication, insulin or both                            | Treated DM <i>N</i> =60/417 (14.4%) or 969 person-years); incidence rate 61.9/1,000 person-years             | n/a                                                            | Base model                                                                                | Distinguished between treated and untreated DM<br><br>Incident depression symptoms assessed at 1 follow-up visit<br><br>No control for marital status                   |
|                            |                          | Treated DM: <i>n</i> =417                             |                 |              | Treated DM 64.9 (9.40)     |       | Treated DM 54.5%     |                             |                                                                                                                |                                                                                                                | Treated DM OR=1.54 (95% CI = 1.13–2.09) <sup>n</sup>                                                         |                                                                |                                                                                           |                                                                                                                                                                         |
|                            |                          | Untreated DM: <i>n</i> =203                           |                 |              | Untreated DM 63.7 (9.5)    |       | Untreated DM 61.6%   |                             |                                                                                                                |                                                                                                                | Untreated DM OR=0.75 (95% CI = 0.44–1.27) <sup>n</sup>                                                       |                                                                |                                                                                           |                                                                                                                                                                         |
|                            |                          | Normal fasting: <i>n</i> =2,868                       |                 |              | Normal fasting 60.7 (10.1) |       | Normal fasting 45.3% |                             |                                                                                                                |                                                                                                                | Treated DM OR=1.52 (95% CI = 1.09–2.12) <sup>o</sup>                                                         |                                                                |                                                                                           |                                                                                                                                                                         |
| NL: Luijendijk et al. [30] | Prospective cohort study | <i>N</i> =2,931                                       | <i>N</i> =2,931 | -            | 71.0 (6.3)                 | 61–95 | 42                   | Mean = 5                    | CES-D $\geq$ 16 followed by diagnostic interview (Schedules for Clinical Assessment in Neuro-psychiatry, SCAN) | Fasting plasma glucose $\geq$ 7.0 mmol/l or OGTT $\geq$ 11.1 mmol/l or treatment with hypoglycaemic medication | Overall sample: 303 had CES-D $\geq$ 16                                                                      | n/a                                                            | Incident depressive symptoms Beta=0.76 (95% CI = 0.02–1.50), <i>p</i> =0.043 <sup>s</sup> | Used diagnosis of depression<br><br>Study of cardiovascular risk factors and incident depression. Diabetes was one risk factor.<br><br>Diabetes sample may include T1DM |
|                            |                          | DM: <i>n</i> =391                                     |                 |              |                            |       |                      |                             |                                                                                                                |                                                                                                                | 94 met DSM-IV criteria for depressive disorder (MDD <i>n</i> =46, MinDD <i>n</i> =41, dysthymia <i>n</i> =7) | Beta=0.73 (95% CI = -0.10, 1.57), <i>p</i> =0.085 <sup>p</sup> | Incident depressive disorder: OR=1.31                                                     |                                                                                                                                                                         |

| Study                     | Design                                | Number of participants without depression at baseline            |             |              | Age (years) at baseline                     |           |                                 | Length of follow-up (years) | Criteria for depression                                                                                                                                                                                                          | Assessment of T2DM                                                                                                                                                             | Cases of incident depression                 | Outcome unadjusted                        | Outcome adjusted                                            | Methodological issues   |
|---------------------------|---------------------------------------|------------------------------------------------------------------|-------------|--------------|---------------------------------------------|-----------|---------------------------------|-----------------------------|----------------------------------------------------------------------------------------------------------------------------------------------------------------------------------------------------------------------------------|--------------------------------------------------------------------------------------------------------------------------------------------------------------------------------|----------------------------------------------|-------------------------------------------|-------------------------------------------------------------|-------------------------|
|                           |                                       | Baseline                                                         | Follow-up I | Follow-up II | Mean (SD)                                   | Range     | % Male                          |                             |                                                                                                                                                                                                                                  |                                                                                                                                                                                |                                              |                                           |                                                             |                         |
|                           |                                       |                                                                  |             |              |                                             |           |                                 |                             |                                                                                                                                                                                                                                  |                                                                                                                                                                                |                                              | (95% CI = 0.75 – 2.29), $p=0.34^e$        |                                                             |                         |
|                           |                                       |                                                                  |             |              |                                             |           |                                 |                             |                                                                                                                                                                                                                                  |                                                                                                                                                                                |                                              | OR=2.07 (95% CI = 1.11–3.85), $p=0.022^p$ |                                                             |                         |
| USA: O'Connor et al. [31] | Retrospective population cohort study | Prevalent DM: $n=2,932$<br><br>Case-matched controls: $n=14,144$ | n/a         | n/a          | DM: 61.0 (0.12)<br><br>Controls 61.0 (0.12) | $\geq 40$ | DM: 51.9<br><br>Controls : 51.9 | 2                           | Presence of 1 or more inpatient or 2 or more outpatient ICD-9 codes for depression, or 1 or more outpatient ICD-9 codes for depression in addition to a filled prescription for therapeutic dose of an antidepressant medication | 1 or more inpatient, or 2 or more outpatient visits for diabetes (ICD-9) codes for diabetes or patient filled a prescription for a diabetes-specific drug other than metformin | DM: 1,117 (7.9%)<br><br>Controls: 778 (5.5%) | $\chi^2=24.85, p<0.001$                   | Prevalent diabetes OR=1.48 (95%CI = 1.35–1.63) <sup>g</sup> | Sample may include T1DM |

<sup>a</sup>OR adjusted for age, sex, BMI and exercise but not for marital status

<sup>b</sup>OR adjusted for age, sex, education level, and living with a partner

<sup>c</sup>OR adjusted for age, sex, education level, living with a partner and physical limitations

<sup>d</sup>OR adjusted for baseline socioeconomic, demographic, and health variables

<sup>e</sup>OR adjusted for age, sex, physician visits, and pre-selected co-morbidities (arthritis, cancer, vascular disease, insulin use)

<sup>f</sup>OR adjusted for age, sex, educational level, and marital status

<sup>g</sup>OR adjusted for age and sex

<sup>h</sup>OR adjusted for age, sex, marital status, education, hypertension, smoking, statin use, cognitive functioning, Katz index, IADL, and presence of chronic somatic disease

<sup>i</sup>Data from two large health studies in Norway, HUNT-1 and HUNT-2 (Nord-Trøndelag Health Studies). All inhabitants of Nord-Trøndelag County aged 20 years and above received invitations to participate in the first and second health studies. Of the total population in the county, 74,997 individuals attended HUNT-1 in 1984–1986 (88.1%) and 65,648 individuals attended HUNT-2 in 1995–1997 (71.3%)

<sup>j</sup>From a random sample of 3,075 white and all-black Medicare-eligible adults, with oversampling of black participants to provide enough statistical power in each race. Eligibility criteria included no difficulty walking 1/4 of a mile, climbing 10 steps, or performing basic activities of daily living; no life-threatening illness; and no plans to leave the area for 3 years

<sup>k</sup>OR adjusted for age, sex, race, study site, and baseline CES-D score

<sup>l</sup>OR adjusted for age, sex, race, study site, baseline CES-D score, education level, smoking habits, alcohol intake, and physical activity level

<sup>m</sup>Both ORs adjusted for age, sex, race, study site, baseline CES-D score, education level, smoking habits, alcohol intake, physical activity level, and DM related co-morbidities (hypertension, cerebrovascular disease, ankle-brachial index, obesity, cystatin-C levels, IL-6 levels, 6 m walking speed, and cognitive impairment)

<sup>n</sup>OR adjusted for age, sex, race/ethnicity, examination site

<sup>o</sup>OR adjusted for BMI, SES, lifestyle, diabetes severity

<sup>p</sup>Adjusted for age, sex, education, income, disability, cognitive function, BMI, all other CVRFs and medication

BDI, Beck Depression Inventory; CDN, Canada; CES-D, Center for Epidemiologic Studies Depression Scale ; CVRF, cerebrovascular risk factors; DM, diabetes mellitus; FPG, fasting plasma glucose; GAD, glutamic acid decarboxylase; HADS-S, Hospital Anxiety and Depression Scale –Short version; IADL, instrumental activities of daily living; n/a, not available; NL, the Netherlands; N, Norway; SES, socioeconomic status; SK, South Korea; SP, Spain; T1DM, type 1 diabetes mellitus; T2DM= type 2 diabetes mellitus
