# Supplementary material for: Type 2 diabetes mellitus as a risk factor for the onset of depression: a systematic review and meta-analysis
Source: Springer Nature journal article supplement (doi:10.1007/s00125-010-1874-x), 2010-08-13
Supplement: MOESM3 [file 8089440]

**Electronic supplementary material**

**ESM Table 3** Quality assessment of included studies

| <b>Study</b>           | <b>Sufficient description of the groups (DM, DM + Dep, Without DM, Dep without DM)</b> | <b>Control for confounding variables (age, sex, SES, education)</b> | <b>Blinding of baseline assessment data (diagnosis only)</b> | <b>Description of follow-up numbers</b> | <b>Description of dropout rates</b> | <b>Comparison of dropout rates between groups on key variables</b> |
|------------------------|----------------------------------------------------------------------------------------|---------------------------------------------------------------------|--------------------------------------------------------------|-----------------------------------------|-------------------------------------|--------------------------------------------------------------------|
| Palinkas et al. [21]   | Inadequate                                                                             | Adequate                                                            | n/a                                                          | Adequate                                | Adequate                            | Adequate                                                           |
| Bisschop et al. [22]   | Inadequate                                                                             | Adequate                                                            | n/a                                                          | Adequate                                | Adequate                            | Adequate                                                           |
| Polsky et al. [23]     | Inadequate                                                                             | Inadequate                                                          | n/a                                                          | Adequate                                | Adequate                            | Inadequate                                                         |
| Brown et al. [24]      | Adequate                                                                               | Inadequate or over-adjusted                                         | Not reported <sup>a</sup>                                    | Inadequate                              | Inadequate                          | Inadequate                                                         |
| Kim et al. [25]        | Inadequate                                                                             | Inadequate or over-adjusted                                         | Not reported                                                 | Adequate                                | Adequate                            | Adequate                                                           |
| De Jonge et al. [26]   | Inadequate                                                                             | Adequate                                                            | Adequate                                                     | Adequate                                | Adequate                            | Inadequate                                                         |
| Engum [27]             | Inadequate                                                                             | Adequate                                                            | n/a                                                          | Adequate                                | Inadequate                          | Inadequate                                                         |
| Maraldi et al. [28]    | Inadequate                                                                             | Adequate                                                            | n/a                                                          | Adequate                                | Adequate                            | Inadequate                                                         |
| Golden et al. [29]     | Inadequate                                                                             | Adequate                                                            | n/a                                                          | Adequate                                | Inadequate                          | Inadequate                                                         |
| Luijendijk et al. [30] | Inadequate                                                                             | Adequate                                                            | Not reported                                                 | Adequate                                | Inadequate                          | Inadequate                                                         |
| O'Connor et al. [31]   | Inadequate                                                                             | Adequate                                                            | Not reported <sup>a</sup>                                    | Inadequate                              | Inadequate                          | Inadequate                                                         |

<sup>a</sup>This was a retrospective study. Diagnosis was carried out by GP

Dep, depression; DM, diabetes mellitus; n/a, not applicable; SES, socioeconomic status
