# Supplementary material for: Type 2 diabetes mellitus as a risk factor for the onset of depression: a systematic review and meta-analysis
Source: Springer Nature journal article supplement (doi:10.1007/s00125-010-1874-x), 2010-08-13
Supplement: MOESM4 [file 8089440]

## Electronic supplementary material

**ESM Fig. 1** Flow diagram of the selection of studies for the meta-analysis

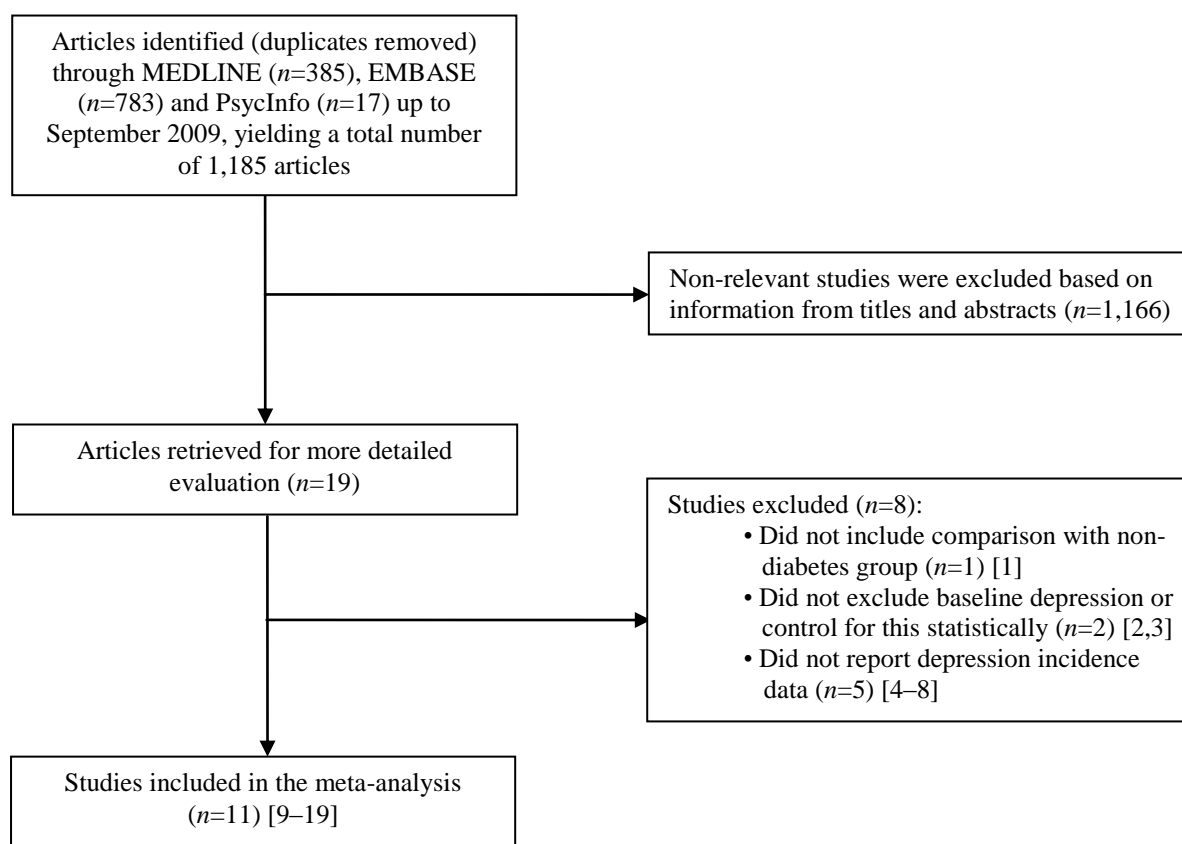

## References

1. Kessing LV, Nilsson FM, Siersma V, Andersen PK (2003) No increased risk of developing depression in diabetes compared to other chronic illness. *Diabet Res Clin Pract* 62:113–121
2. Anstey KJ, von Sanden C, Sargent-Cox K, Luszcz MA (2007) Prevalence and risk factors for depression in a longitudinal, population-based study including individuals in the community and residential care. *Am J Geriatr Psychiatry* 15:497–505
3. Knol MJ, Heerdink ER, Egberts ACG et al (2007) Depressive symptoms in subjects with diagnosed and undiagnosed type 2 diabetes. *Psychosom Med* 69:300–305
4. Khamseh ME, Baradaran HR, Rajabali H (2007) Depression and diabetes in Iranian patients: a comparative study. *Int J Psychiatry Med* 37:81–86
5. Finkelstein EA, Bray JW, Chen H et al (2003) Prevalence and costs of major depression among elderly claimants with diabetes. *Diabetes Care* 26:415–420
6. Chou KL, Chi I (2005) Prevalence of depression among elderly Chinese with diabetes. *Int J Geriatr Psychiatry* 20:570–575
7. Egede LE (2005) Effect of comorbid chronic disease on prevalence and odds of depression in adults with diabetes. *Psychosom Med* 67:46–51
8. Schnittker J (2005) Chronic illness and depressive symptoms late in life. *Soc Sci Med* 60:13–23
9. Palinkas LA, Lee PP, Barrett-Connor E (2004) A prospective study of type 2 diabetes and depressive symptoms in the elderly: the Rancho Bernardo Study. *Diabet Med* 21: 1185–1191

10. Bisschop MI, Kriegsman DM, Deeg DJ, Beekman AT, van Tilburg W (2004) The longitudinal relation between chronic diseases and depression in older persons in the community: the Longitudinal Aging Study Amsterdam. *J Clin Epidemiol* 57: 187-194.
11. Polsky D, Doshi JA, Marcus S et al (2005) Long-term risk for depressive symptoms after a medical diagnosis. *Arch Intern Med* 165: 1260-1266
12. Brown LC, Majumdar SR, Newman SC, Johnson JA (2006) Type 2 diabetes does not increase risk of depression. *CMAJ* 175: 42-46
13. Kim JM, Stewart R, Kim SW, Yang SJ, Shin IS, Yoon JS (2006) Vascular risk factors and incident late-life depression in a Korean population. *Br J Psychiatry* 189: 26-30
14. de Jonge P, Roy JF, Saz P, Marcos G, Lobo A; ZARADEMP Investigators (2006) Prevalent and incident depression in community-dwelling elderly persons with diabetes mellitus: results from the ZARADEMP project. *Diabetologia* 49: 2627-2633
15. Engum A (2007) The role of depression and anxiety in onset of diabetes in a large population-based study. *J Psychosom Res* 62: 31-38
16. Maraldi C, Volpato S, Penninx BW et al (2007) Diabetes mellitus, glycemic control, and incident depressive symptoms among 70- to 79-year-old persons: the health, aging, and body composition study. *Arch Intern Med* 167: 1137-1144
17. Golden SH, Lazo M, Carnethon M et al (2008) Examining a bidirectional association between depressive symptoms and diabetes. *JAMA* 299: 2751-2759
18. Luijendijk HJ, Stricker BH, Hofman A, Witteman JC, Tiemeier H (2008) Cerebrovascular risk factors and incident depression in community-dwelling elderly. *Acta Psychiatr Scand* 118: 139-148
19. O'Connor PJ, Crain AL, Rush WA, Hanson AM, Fischer LR, Kluznik JC (2009) Does diabetes double the risk of depression? *Ann Fam Med* 7:328-335
